# Supplementary figures and images for: Structural basis of EHEP-mediated offense against phlorotannin-induced defense from brown algae to protect akuBGL activity
Source: eLife journal article supplement (doi:10.7554/elife.88939), 2023-07-27

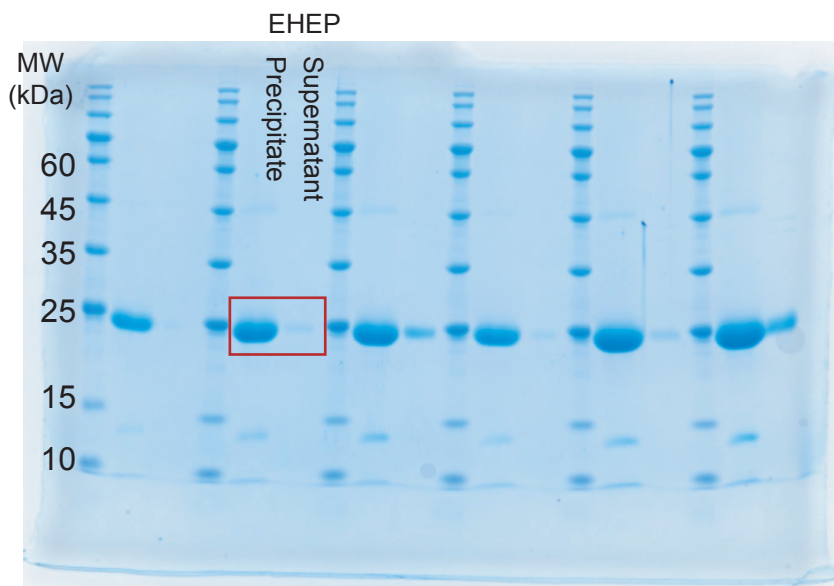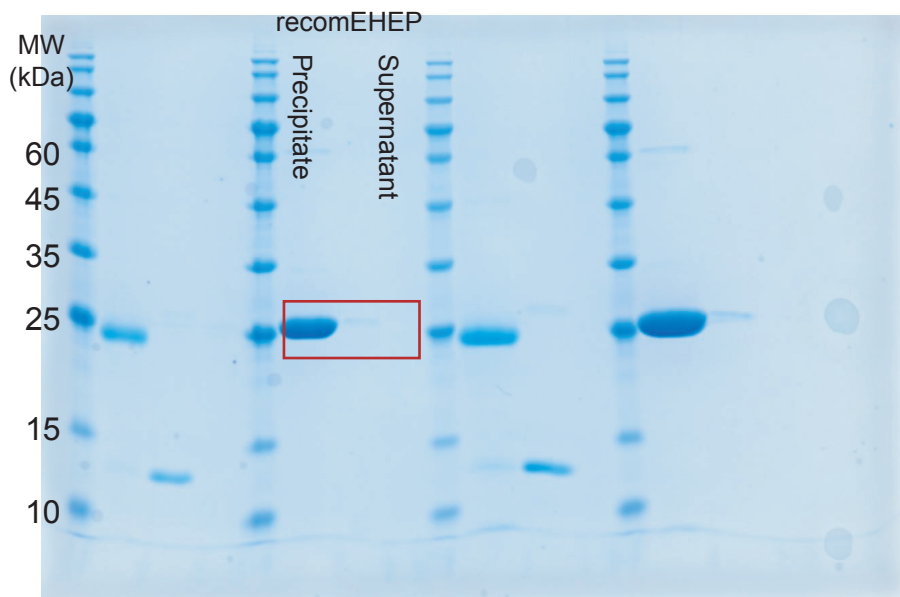

Supplement: fig2-figsupp1-data1 [file elife-88939-fig2-figsupp1-data1-v1.zip]

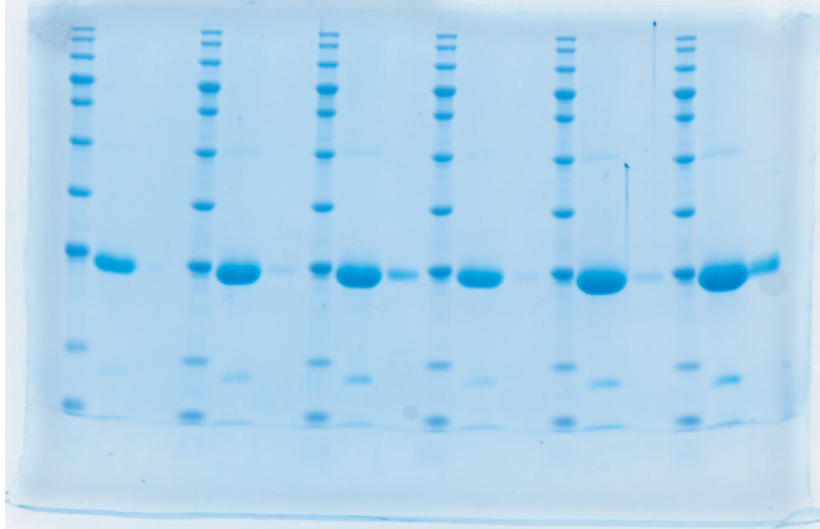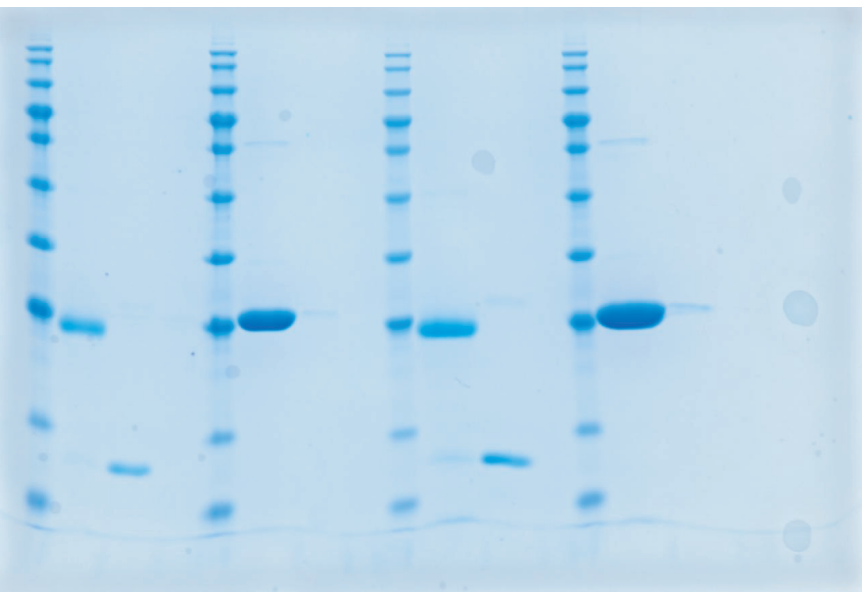

Supplement: fig2-figsupp1-data1 [file elife-88939-fig2-figsupp1-data1-v1.zip]

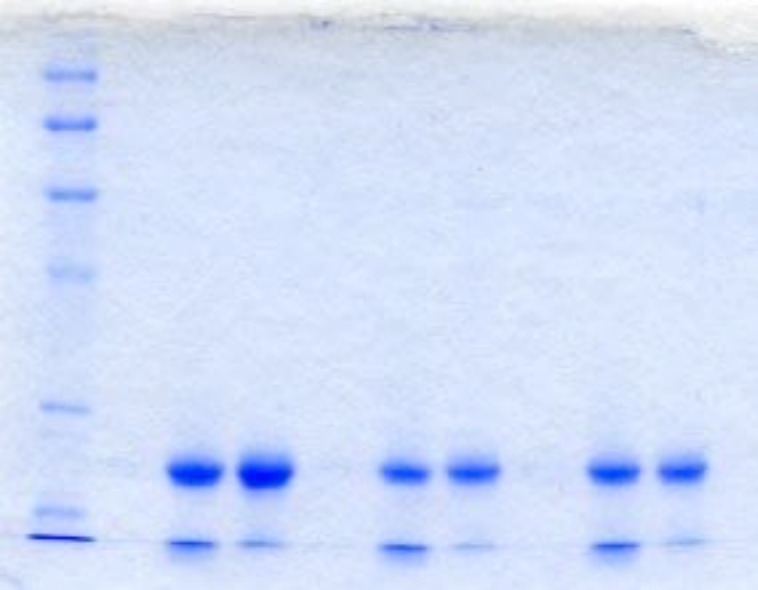

Supplement: fig3-figsupp1-data1 [file elife-88939-fig3-figsupp1-data1-v1.zip]

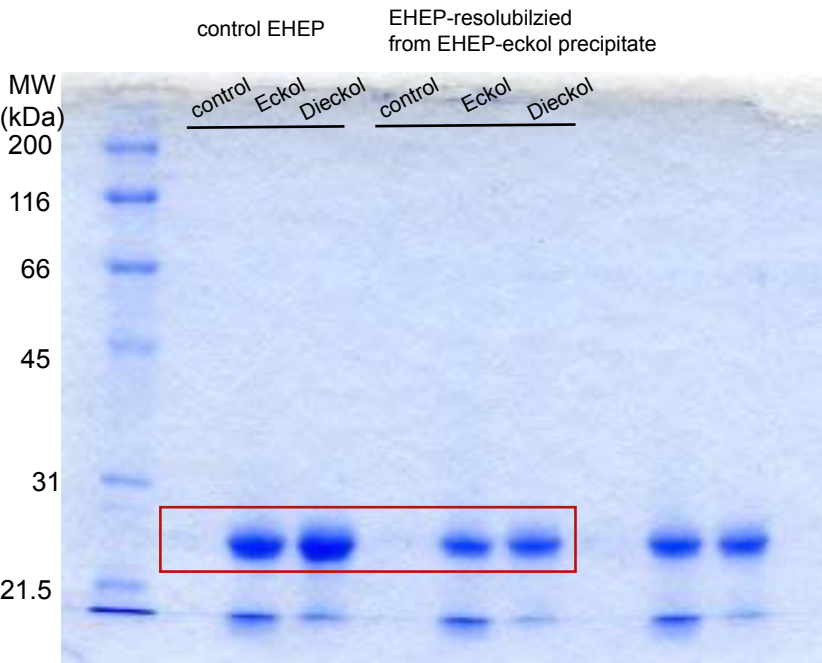

Supplement: fig3-figsupp1-data1 [file elife-88939-fig3-figsupp1-data1-v1.zip]

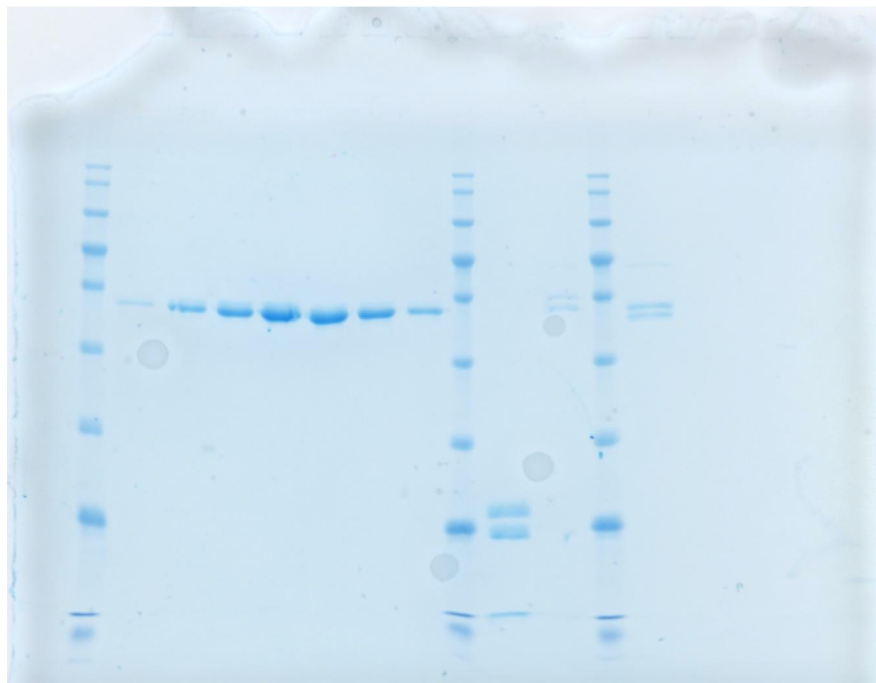

Supplement: fig4-figsupp1-data1 [file elife-88939-fig4-figsupp1-data1-v1.zip]

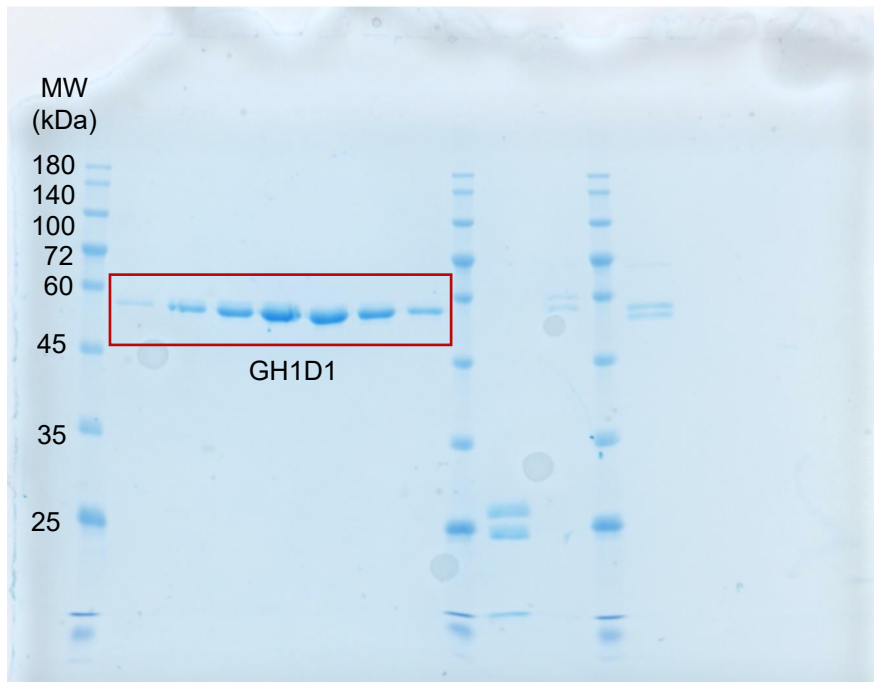

Supplement: fig4-figsupp1-data1 [file elife-88939-fig4-figsupp1-data1-v1.zip]
